# Supplementary material
Source: publisher figshare collection journal article supplement (https://aacr.figshare.com/articles/dataset/_/22516311)
Supplement: Supplementary file 1 [file 39978852]

**B**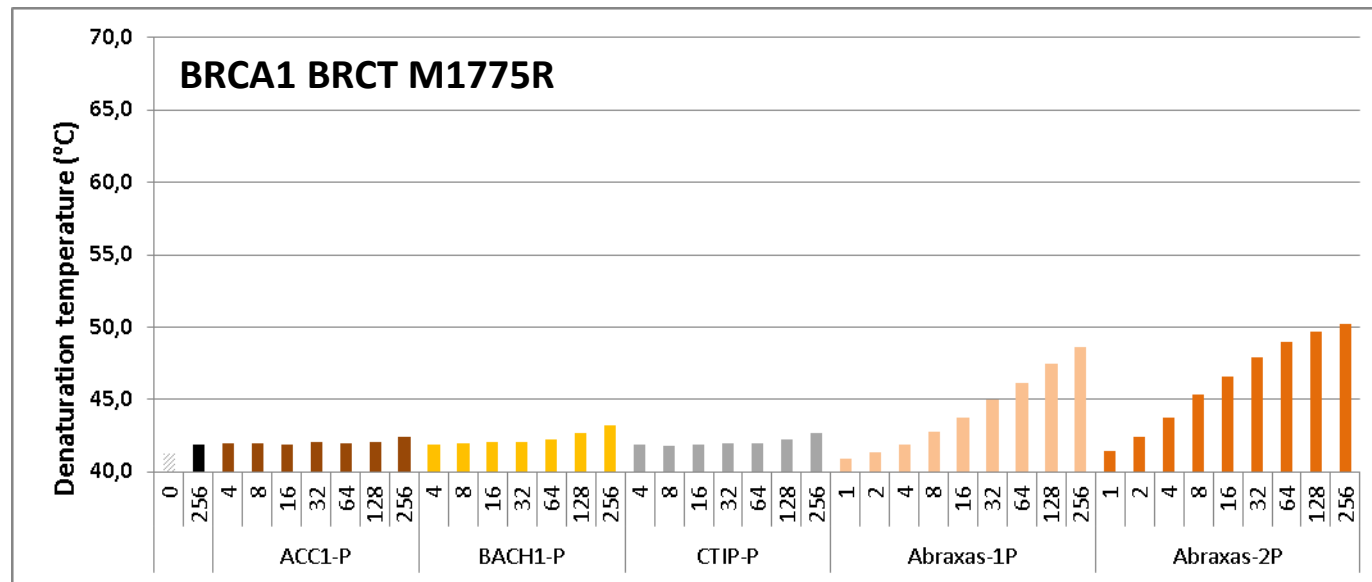**C**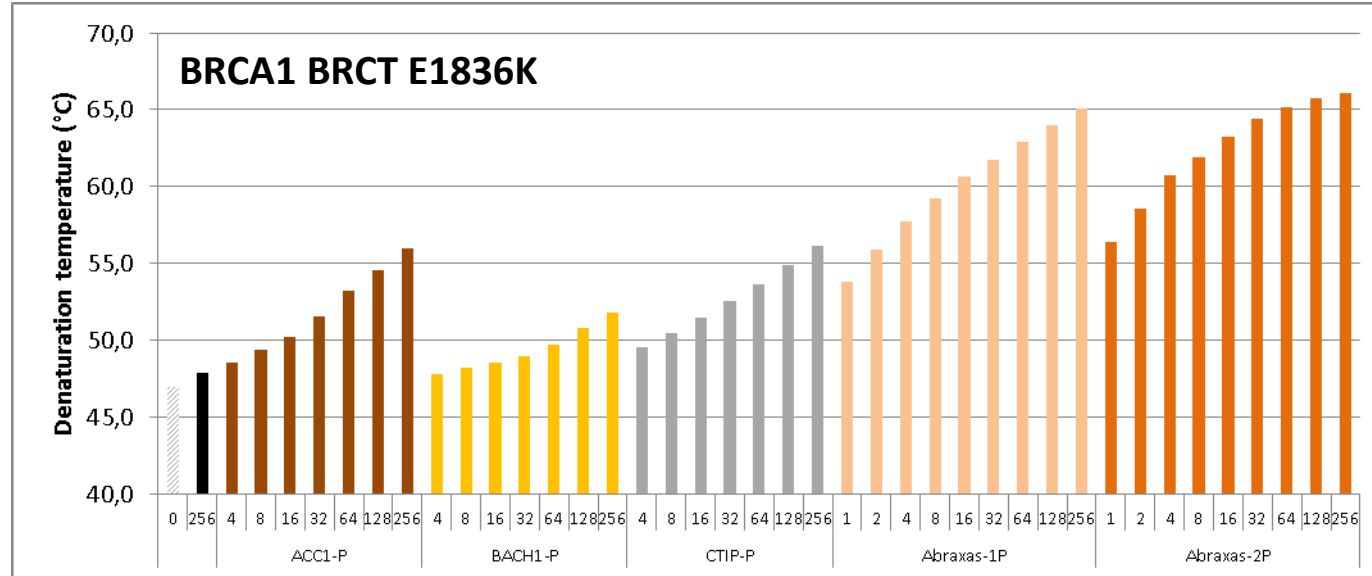

**Supplementary Figure 6. (B-C) FBTSA assays performed to measure binding of the mutated BRCA1 BRCT domains to ACC1-P, BACH1-P, CtiP-P, AB-1P and AB-2P.**
